# Supplementary material
Source: MDPI journal article supplement (https://www.mdpi.com/2227-9717/11/4/1279)
Supplement: s1 [file s1 › processes-2330668-supplementary.pdf]

# **Supplementary Material For**

**Enhanced activation of peroxymonosulfate via sulfate  
radicals and singlet oxygen by  $\text{SrCo}_x\text{Mn}_{1-x}\text{O}_3$   
perovskites for the degradation of Rhodamine B**

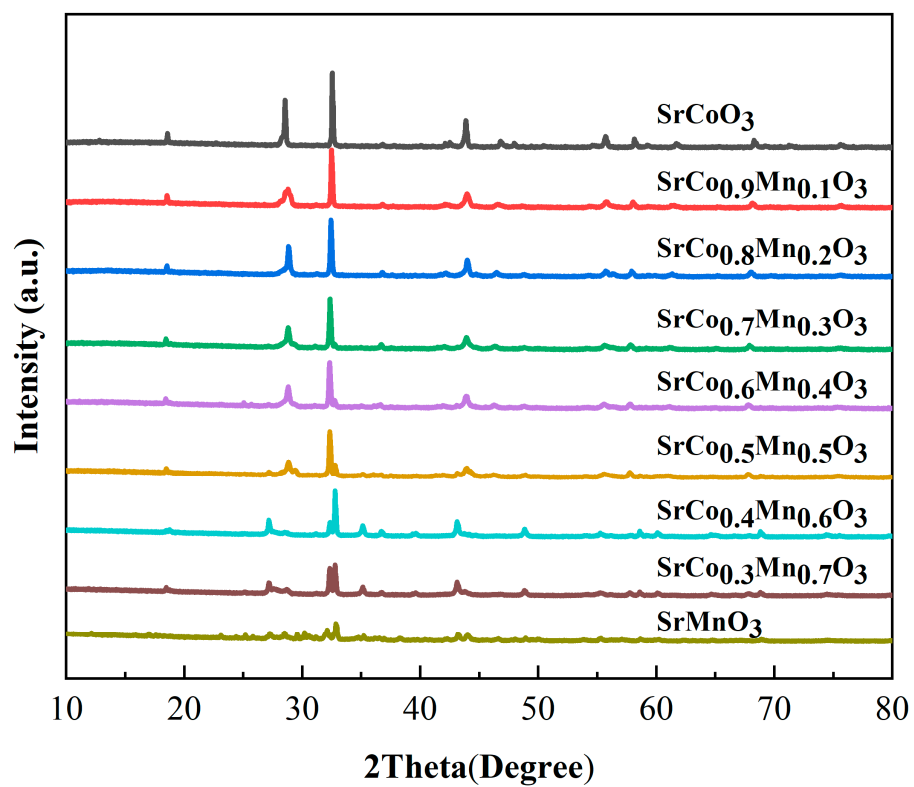

**Figure S1.** XRD patterns of  $\text{SrCo}_x\text{Mn}_{1-x}\text{O}_3$  perovskites.

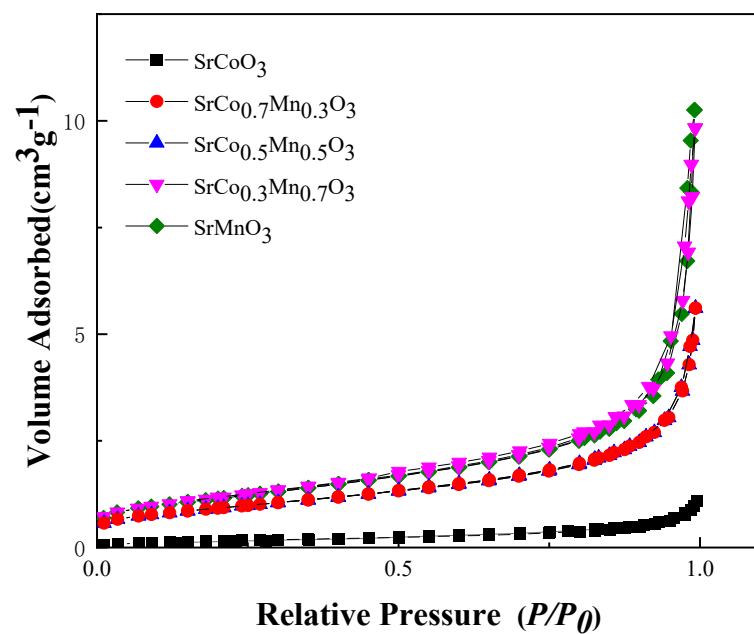

**Figure S2.** Nitrogen adsorption-desorption isotherms of perovskite catalysts with different Mn substituted amounts.

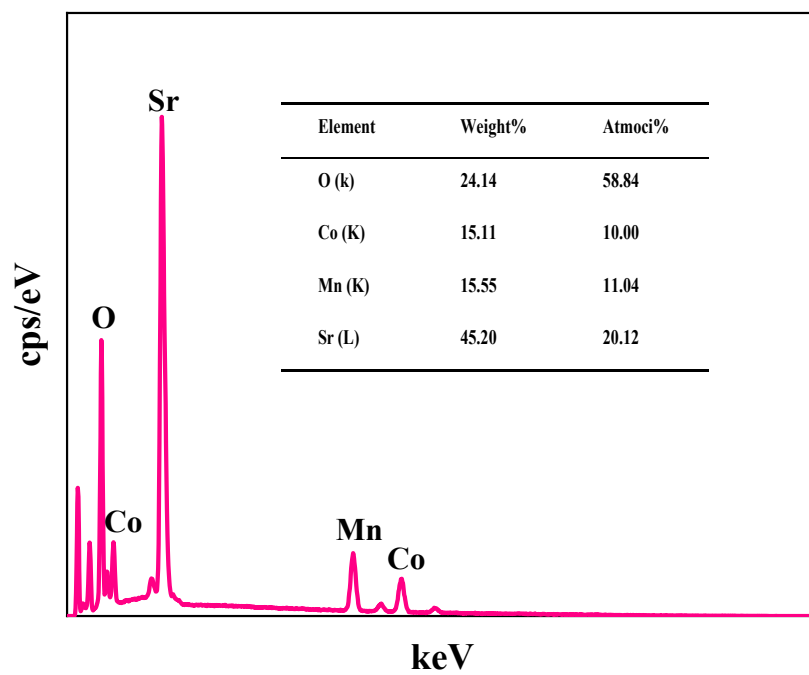

**Figure S3.** EDS mapping spectura of SrCo<sub>0.5</sub>Mn<sub>0.5</sub>O<sub>3</sub> samples.

The catalysts were also characterized by FT-IR spectrometry to investigate the effect of Mn-substitution and other feature functional groups, as shown in Fig. 3a. The absorption band at about  $1450\text{ cm}^{-1}$  ascribed to  $\text{CO}_3^{2-}$  species on  $\text{SrCo}_x\text{Mn}_{1-x}\text{O}_3$  perovskites[1, 2]. The characteristic absorption bands at about  $528\text{ cm}^{-1}$  are attributed to the asymmetrical lengthening of the Co–O bond of the  $[\text{CoO}_6]$  octahedrons of the  $\text{SrCoO}_3$  perovskite. However, with the increasing substitution of Mn cation, the peak gradually disappears and new sharper higher peaks were observed at  $430\text{ cm}^{-1}$  and  $607\text{ cm}^{-1}$ , which was probably caused by a deformation mode of  $[\text{MnO}_6]$  octahedron[3]. It was further shown that Mn successfully induced the lattice of the perovskites during the synthesis process.

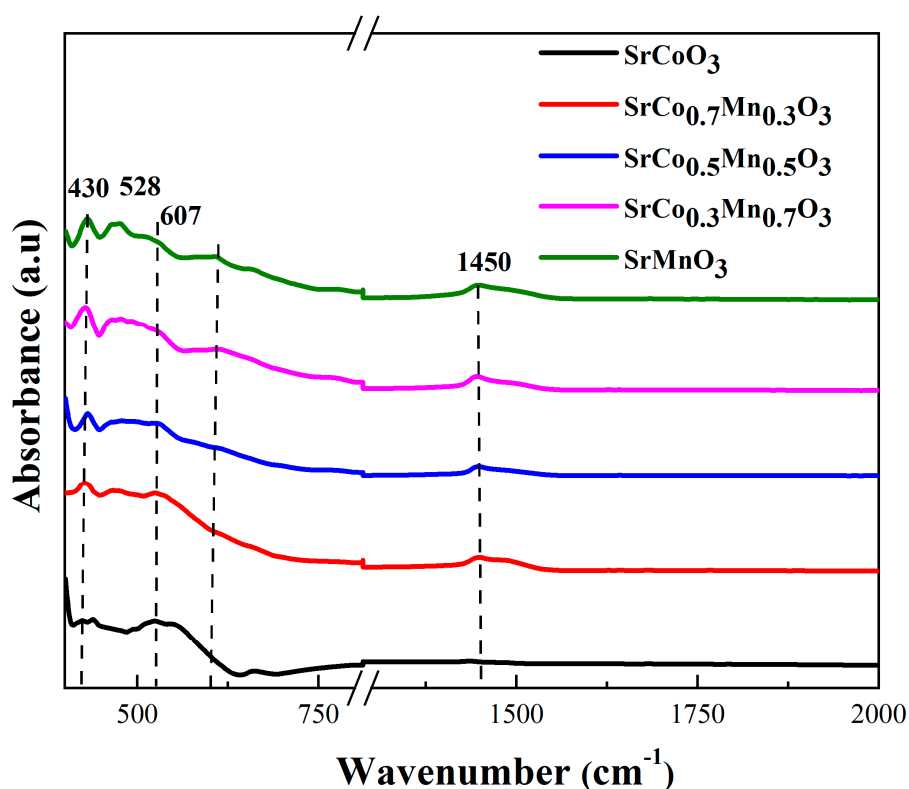

**Figure S4** FT-IR of  $\text{SrCo}_x\text{Mn}_{1-x}\text{O}_3$  perovskites.

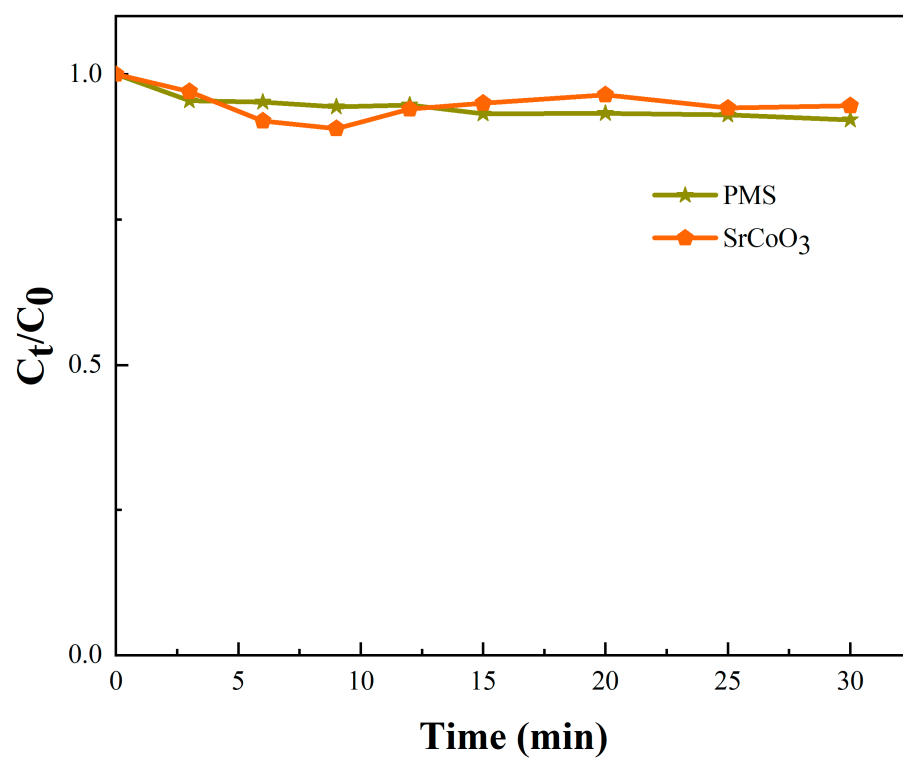

**Figure S5.** Degradation efficiency of RhB in the presence of  $\text{SrCoO}_3$  and PMS alone. Reaction conditions: PMS:0.06mM,  $\text{SrCoO}_3$ :0.03g L<sup>-1</sup>, T=298k,pH=7.

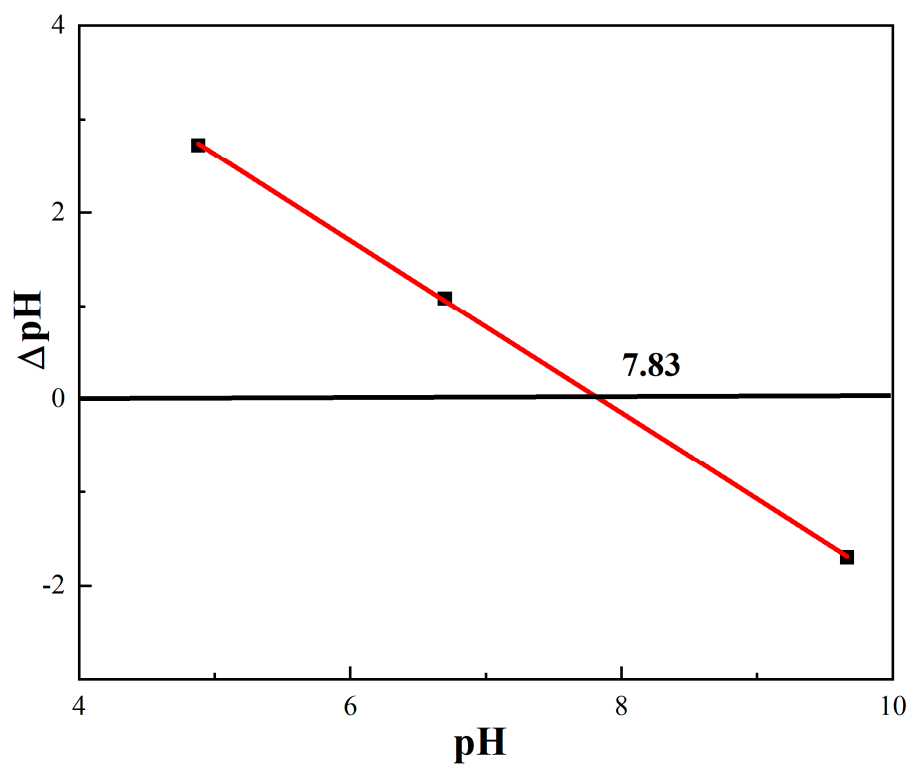

**Figure S6.**  $\text{pH}_{\text{pzc}}$  of  $\text{SrCo}_{0.5}\text{Mn}_{0.5}\text{O}_3$  perovskite.

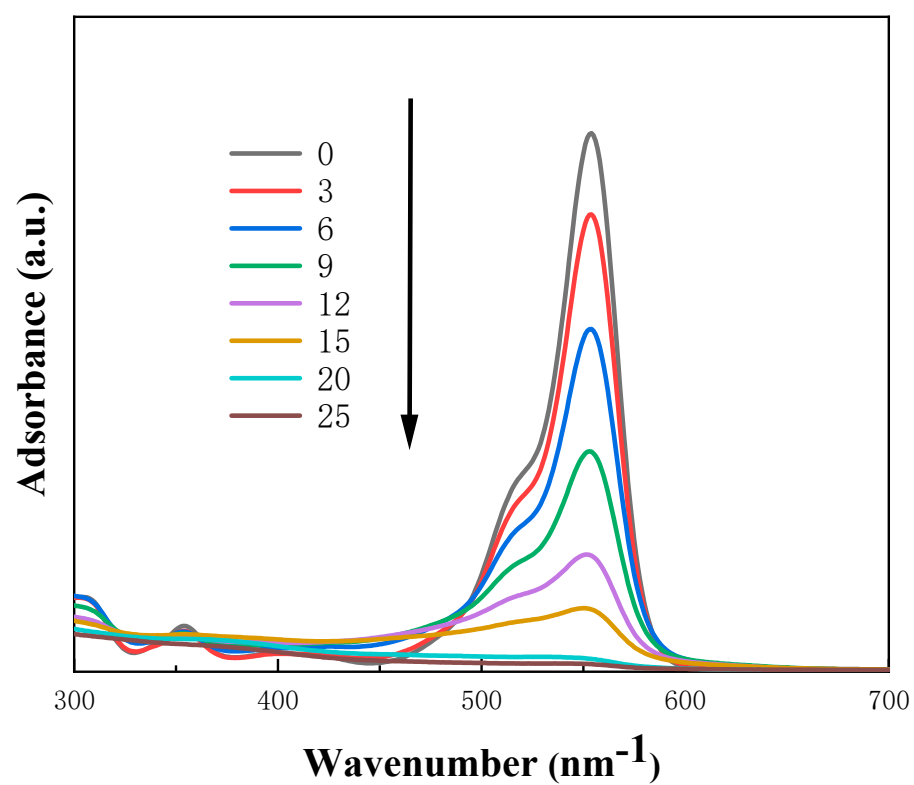

**Figure S7.** UV-VIS spectura of RHB in different time.

**Table S1.**

Lattice parameters of  $\text{SrCoO}_3$  and  $\text{SrCo}_{0.5}\text{Mn}_{0.5}\text{O}_3$  samples.

| Sample                                       | Lattice constant (Å) |          |          |
|----------------------------------------------|----------------------|----------|----------|
|                                              | <i>a</i>             | <i>b</i> | <i>c</i> |
| $\text{SrCoO}_3$                             | 5.5883               | 5.5883   | 5.5296   |
| $\text{SrCo}_{0.5}\text{Mn}_{0.5}\text{O}_3$ | 5.5333               | 5.5333   | 5.4533   |

**Table S2.**

the proportion of Co and Mn in fresh and used  $\text{SrCo}_{0.5}\text{Mn}_{0.5}\text{O}_3$  perovskite from XPS spectura.

| Element | Co               |                  |                                 | Mn               |                  |                                 |
|---------|------------------|------------------|---------------------------------|------------------|------------------|---------------------------------|
|         | $\text{Co}^{2+}$ | $\text{Co}^{3+}$ | $\text{Co}^{2+}/\text{Co}^{3+}$ | $\text{Mn}^{3+}$ | $\text{Mn}^{4+}$ | $\text{Mn}^{4+}/\text{Mn}^{3+}$ |
| Fresh   | 44.77            | 55.23            | 81.01                           | 68.26            | 31.74            | 46.50                           |
| Used    | 42.44            | 57.56            | 73.73                           | 71.91            | 28.09            | 39.06                           |

**Table S3.**

the proportion of O species in fresh and used  $\text{SrCo}_{0.5}\text{Mn}_{0.5}\text{O}_3$  perovskite from XPS spectura.

|       | $\text{O}_{\text{latt}}$ | $\text{O}_{\text{L}^-}$ | -OH   | $\text{H}_2\text{O}$ |
|-------|--------------------------|-------------------------|-------|----------------------|
| Fresh | 24.77                    | 16.39                   | 49.33 | 9.50                 |
| Used  | 15.05                    | 49.48                   | 18.24 | 17.22                |

#### Reference

- [1] P. Zhao, F. Fang, N. Feng, C. Chen, G. Liu, L. Chen, Z. Zhu, J. Meng, H. Wan, G. Guan, Self-templating construction of mesopores on three dimensionally ordered macroporous  $\text{La}_{0.5}\text{Sr}_{0.5}\text{MnO}_3$  perovskite with enhanced performance for soot combustion, *Catalysis Science & Technology*, 9 (2019) 1835-1846.
- [2] S. Zhao, L. Wang, Y. Wang, X. Li, Hierarchically porous  $\text{LaFeO}_3$  perovskite prepared from the pomelo peel bio-template for catalytic oxidation of NO, *Journal of Physics and Chemistry of Solids*, 116 (2018) 43-49.
- [3] S. Demirel, E. Oz, S. Altin, A. Bayri, O. Baglayan, E. Altin, S. Avci, Structural, magnetic, electrical and electrochemical properties of  $\text{SrCoO}_{2.5}$ ,  $\text{Sr}_9\text{Co}_2\text{Mn}_5\text{O}_{21}$  and  $\text{SrMnO}_3$  compounds, *Ceramics International*, 43 (2017) 14818-14826.
